# Supplementary material
Source: publisher figshare collection journal article supplement (https://wiley.figshare.com/articles/dataset/_/3518762)
Supplement: Supplementary file 1 [file 1]

Appendix D. Model ranking of detection probability ( $p$ ) models for wood frogs within Cormack-Jolly-Seber mark-recapture models. For all models, survival ( $\phi$ ) is time dependent but not affected by additional parameters.  $p$  does not vary with capture occasion. The habitat parameter differentiates between forested and early successional forest.

| <b>Model</b>                       | <b><math>\Delta AIC_c</math></b> | <b><math>AIC_c</math> wt</b> | <b>Parameters</b> | <b>Deviance</b> |
|------------------------------------|----------------------------------|------------------------------|-------------------|-----------------|
| $\phi(t) p(\cdot)$                 | 0                                | 0.26                         | 3                 | 278.07          |
| $\phi(t) p(SVL)$                   | 0.31                             | 0.23                         | 4                 | 276.34          |
| $\phi(t) p(Habitat)$               | 1.24                             | 0.14                         | 4                 | 277.26          |
| $\phi(t) p(density)$               | 1.94                             | 0.10                         | 4                 | 277.96          |
| $\phi(t) p(SVL, density)$          | 2.25                             | 0.09                         | 5                 | 276.22          |
| $\phi(t) p(Habitat, SVL)$          | 2.36                             | 0.08                         | 5                 | 276.33          |
| $\phi(t) p(Habitat, density)$      | 2.62                             | 0.07                         | 5                 | 276.59          |
| $\phi(t) p(Habitat, SVL, density)$ | 4.32                             | 0.03                         | 6                 | 276.222         |
